Correction

## Correction: IGF-1 and hyperglycaemia-induced FOXA1 and IGFBP-2 affect epithelial to mesenchymal transition in prostate epithelial cells

Rehanna Mansor<sup>1,2</sup>, Jeff Holly<sup>1</sup>, Rachel Barker<sup>1</sup>, Kalina Biernacka<sup>1</sup>, Hanna Zielinska<sup>1</sup>, Anthony Koupparis<sup>3</sup>, Edward Rowe<sup>3</sup>, Jon Oxley<sup>4</sup>, Alex Sewell<sup>4</sup>, Richard M. Martin<sup>5,6</sup>, Athene Lane<sup>5,6</sup>, Lucy Hackshaw-McGeagh<sup>5</sup> and Claire Perks<sup>1</sup>

<sup>1</sup>IGFs and Metabolic Endocrinology Group, Bristol Medical School, Translational Health Sciences, University of Bristol, Southmead Hospital, Bristol, UK

<sup>2</sup>Faculty of Medicine, Royal College of Medicine Perak, Universiti Kuala Lumpur, Ipoh, MY

<sup>3</sup>Department of Urology, Bristol Urological Institute, Southmead Hospital, Bristol, UK

<sup>4</sup>Department of Cellular Pathology, North Bristol NHS Trust, Southmead Hospital, Bristol, UK

<sup>5</sup>NIHR Biomedical Research Centre, Level 3, University Hospitals Bristol Education Centre, Bristol, UK

<sup>6</sup>Population Health Sciences, University of Bristol, Bristol, UK

**Published:** January 26, 2023

**Copyright:** © 2023 Mansor et al. This is an open access article distributed under the terms of the [Creative Commons Attribution License](https://creativecommons.org/licenses/by/3.0/) (CC BY 3.0), which permits unrestricted use, distribution, and reproduction in any medium, provided the original author and source are credited.

**This article has been corrected:** In Figure 1, the legend has been amended to show that the  $\beta$ -catenin blots in panel A were re-used in panels D and F as well. The corrected Figure 1 legend is shown below. The authors declare that these corrections do not change the results or conclusions of this paper.

Original article: Oncotarget. 2020; 11:2543–2559. <https://doi.org/10.18632/oncotarget.27650>

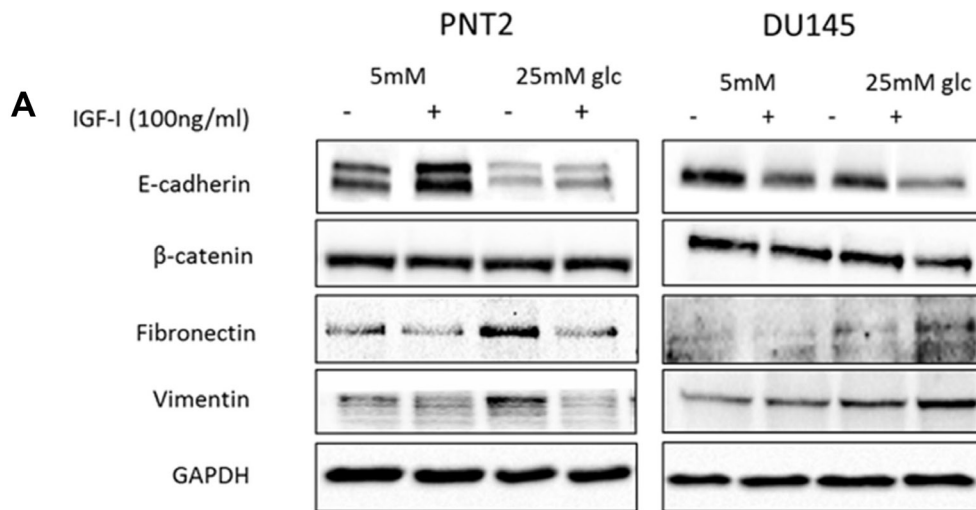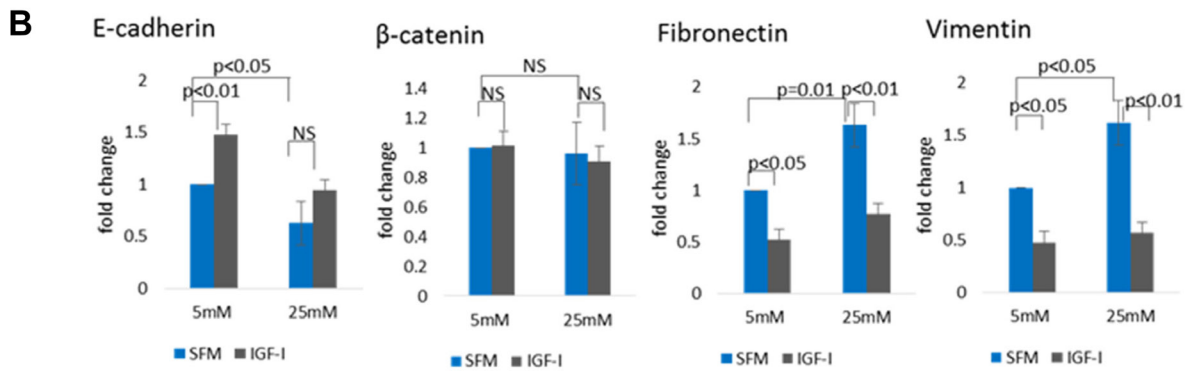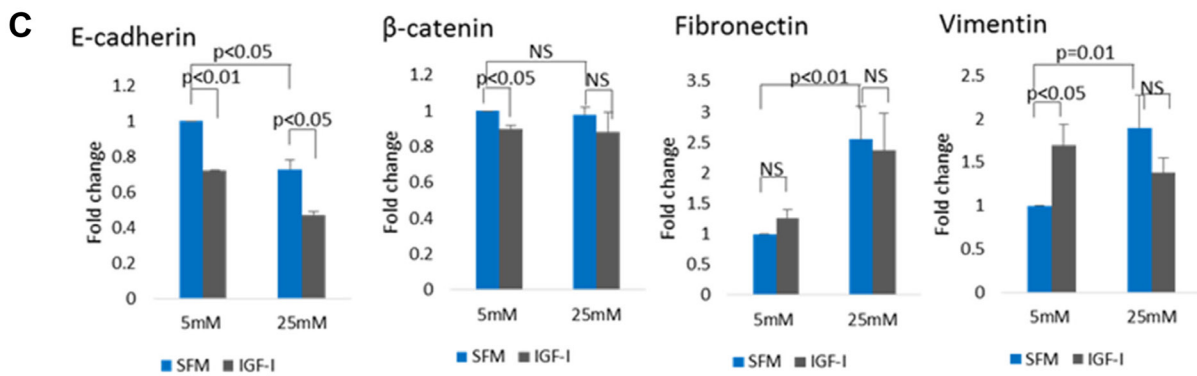

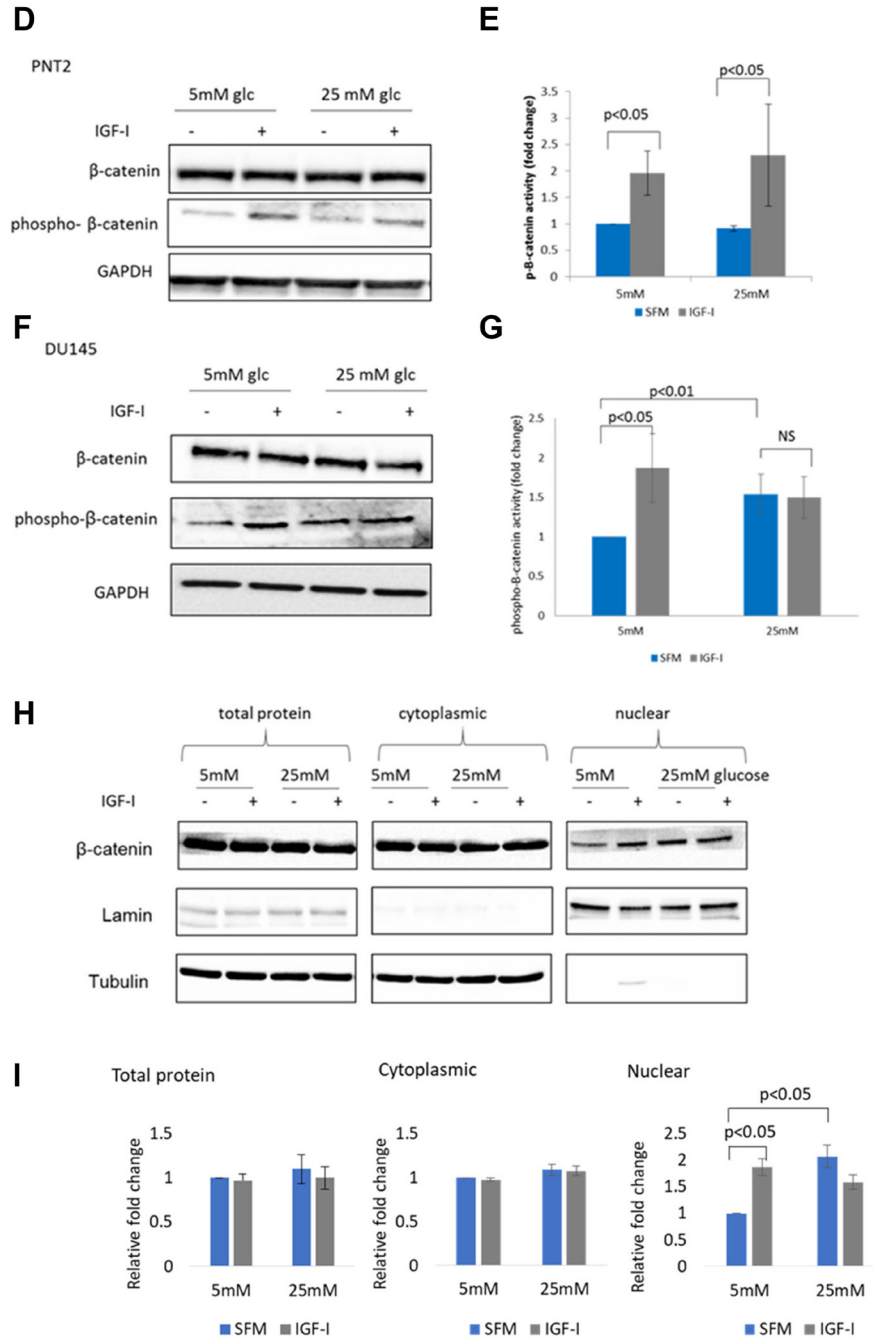

**Figure 1: The effect of IGF-I on EMT markers in prostate epithelial cells in altered glucose condition.** (A) Western blot image shows the effect of IGF-I and high glucose on mesenchymal markers in PNT2 and DU145 cells. Cells were dosed with IGF-I 100 ng/ml for 48 hours in normal (5 mM) and high (25 mM) glucose serum free media. Equal amounts of extracted proteins were separated by SDS-PAGE, blotted to a nitrocellulose membrane and probed with primary antibodies against E-cadherin, β-catenin, fibronectin, vimentin and GAPDH. GAPDH was used as a loading control. Optical densities of protein blots for (B) PNT2 and (C) DU145 were quantitated using image J and normalised to GAPDH. Western blots showing regulation of p-β-catenin in (D) PNT2 and (F) DU145 cells when treated with 100 ng/ml IGF-I in normal (5 mM) and high (25 mM) glucose serum free media. The β-catenin blots in (D) and (F) were reused from β-catenin blots in (A). Optical densities of protein blots for (E) PNT2 and (G) DU145 were quantitated using image J and normalised to GAPDH. Ratio of normalised total β-catenin: p-β-catenin were measured and used as an indicator of β-catenin activity. The data expressed as fold changes relative to control represent mean±SE of triplicate experiments. (H) Western blot showing cytosolic and nuclear fractions of protein separated from whole cells lysate (total protein) from DU145 cells treated or untreated with 100 ng/ml IGF-I for 48 hours in normal (5 mM) and high (25 mM) glucose serum free media. Laminin A/C and tubulin act as nuclear and cytoplasmic loading controls respectively. Results shown are representative of three independent experiments. Data are represented as mean ± SEM.
